# Supplementary material
Source: PubMed Central journal article supplement (PMC3145692)
Supplement: 1103353108_pnas.201103353SI.pdf [file 1103353108_pnas.201103353SI.pdf]

# Supporting Information

Slik et al. 10.1073/pnas.1103353108

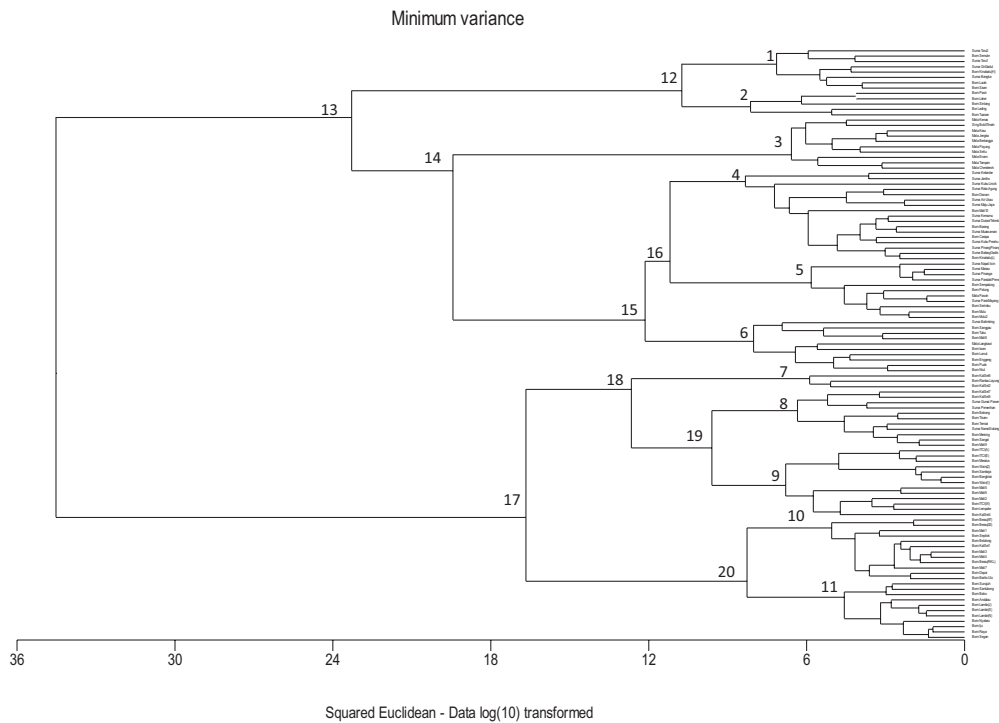

Fig. S1. Final cluster results of all 111 locations. Nodes are numbered, with the first 11 representing the terminal clusters mentioned in the main text and Fig. 2.

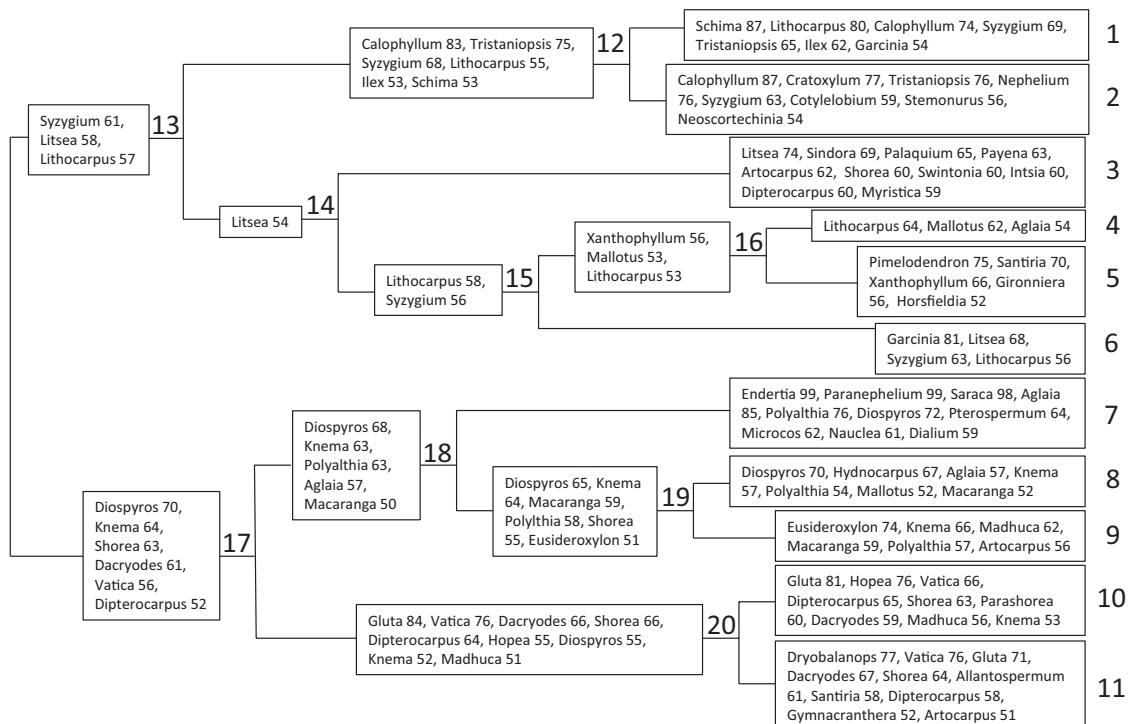

Fig. S2. The significant indicator genera for each node (as indicated in Fig. S1) in the cluster dendrogram. The values behind each genus name are the indicator value (IV), which ranges between 0 and 100 (0 means no association with the cluster, and 100 means maximum association with the cluster).

| Map 26                                                                                              |                                                                                                                                                                                                                                                                                                                                                                                                                                                                                                                                                                                                                                                                                                                                                                                                                                                                                                                                                                                                                                                                                                                                                                                                                                                                                                                                                                                                                                                                                                                                                                                                                                                                                                                                                  | Textural class - Subsoil      |        |                    |           |                               |                    |      |                               |                    |   |                            |                    |   |               |                                   |    |                               |                                   |     |                            |                                   |   |               |                                   |   |                               |                                   |   |                            |                                   |    |               |                                   |         |                               |                                   |   |                            |                                 |   |               |                                 |    |                               |                                 |    |                               |                                 |  |               |                                              |  |  |            |  |  |
|-----------------------------------------------------------------------------------------------------|--------------------------------------------------------------------------------------------------------------------------------------------------------------------------------------------------------------------------------------------------------------------------------------------------------------------------------------------------------------------------------------------------------------------------------------------------------------------------------------------------------------------------------------------------------------------------------------------------------------------------------------------------------------------------------------------------------------------------------------------------------------------------------------------------------------------------------------------------------------------------------------------------------------------------------------------------------------------------------------------------------------------------------------------------------------------------------------------------------------------------------------------------------------------------------------------------------------------------------------------------------------------------------------------------------------------------------------------------------------------------------------------------------------------------------------------------------------------------------------------------------------------------------------------------------------------------------------------------------------------------------------------------------------------------------------------------------------------------------------------------|-------------------------------|--------|--------------------|-----------|-------------------------------|--------------------|------|-------------------------------|--------------------|---|----------------------------|--------------------|---|---------------|-----------------------------------|----|-------------------------------|-----------------------------------|-----|----------------------------|-----------------------------------|---|---------------|-----------------------------------|---|-------------------------------|-----------------------------------|---|----------------------------|-----------------------------------|----|---------------|-----------------------------------|---------|-------------------------------|-----------------------------------|---|----------------------------|---------------------------------|---|---------------|---------------------------------|----|-------------------------------|---------------------------------|----|-------------------------------|---------------------------------|--|---------------|----------------------------------------------|--|--|------------|--|--|
| <p>ArcInfo<br/>Grid file</p> <p><i>Der_soil_prop</i></p>                                            | 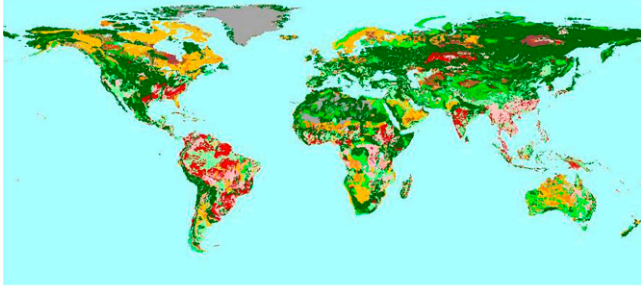                                                                                                                                                                                                                                                                                                                                                                                                                                                                                                                                                                                                                                                                                                                                                                                                                                                                                                                                                                                                                                                                                                                                                                                                                                                                                                                                                                                                                                                                                                                                                                                                                                                               |                               |        |                    |           |                               |                    |      |                               |                    |   |                            |                    |   |               |                                   |    |                               |                                   |     |                            |                                   |   |               |                                   |   |                               |                                   |   |                            |                                   |    |               |                                   |         |                               |                                   |   |                            |                                 |   |               |                                 |    |                               |                                 |    |                               |                                 |  |               |                                              |  |  |            |  |  |
| <p>ArcView<br/>Legend file</p> <p><i>Texture.avl</i></p> <p>Field Displayed</p> <p><i>Txw_s</i></p> | <p>Textural class - Subsoil (Dominant soils    Associated soils)</p> <table border="0"> <tr><td>10 = Organic Soils</td><td>  </td><td>coarse textured soils (sandy)</td></tr> <tr><td>12 = Organic Soils</td><td>  </td><td>medium textured soils (loamy)</td></tr> <tr><td>13 = Organic Soils</td><td>  </td><td>fine textured soils (clay)</td></tr> <tr><td>14 = Organic Soils</td><td>  </td><td>organic soils</td></tr> <tr><td>20 = Course Texturd Soils (sandy)</td><td>  </td><td>medium textured soils (loamy)</td></tr> <tr><td>21 = Course Texturd Soils (sandy)</td><td>  </td><td>fine textured soils (clay)</td></tr> <tr><td>23 = Course Texturd Soils (sandy)</td><td>  </td><td>organic soils</td></tr> <tr><td>24 = Course Texturd Soils (sandy)</td><td>  </td><td>medium textured soils (loamy)</td></tr> <tr><td>30 = Medium Texturd Soils (loamy)</td><td>  </td><td>fine textured soils (clay)</td></tr> <tr><td>31 = Medium Texturd Soils (loamy)</td><td>  </td><td>organic soils</td></tr> <tr><td>32 = Medium Texturd Soils (loamy)</td><td>  </td><td>coarse textured soils (sandy)</td></tr> <tr><td>34 = Medium Texturd Soils (loamy)</td><td>  </td><td>fine textured soils (clay)</td></tr> <tr><td>40 = Fine Textured Soils (clay)</td><td>  </td><td>organic soils</td></tr> <tr><td>41 = Fine Textured Soils (clay)</td><td>  </td><td>coarse textured soils (sandy)</td></tr> <tr><td>42 = Fine Textured Soils (clay)</td><td>  </td><td>medium textured soils (loamy)</td></tr> <tr><td>43 = Fine Textured Soils (clay)</td><td>  </td><td>organic soils</td></tr> <tr><td>99 = Glaciers, Rocks, Shifting Sand, No data</td><td></td><td></td></tr> <tr><td>97 = Water</td><td></td><td></td></tr> </table> |                               |        | 10 = Organic Soils |           | coarse textured soils (sandy) | 12 = Organic Soils |      | medium textured soils (loamy) | 13 = Organic Soils |   | fine textured soils (clay) | 14 = Organic Soils |   | organic soils | 20 = Course Texturd Soils (sandy) |    | medium textured soils (loamy) | 21 = Course Texturd Soils (sandy) |     | fine textured soils (clay) | 23 = Course Texturd Soils (sandy) |   | organic soils | 24 = Course Texturd Soils (sandy) |   | medium textured soils (loamy) | 30 = Medium Texturd Soils (loamy) |   | fine textured soils (clay) | 31 = Medium Texturd Soils (loamy) |    | organic soils | 32 = Medium Texturd Soils (loamy) |         | coarse textured soils (sandy) | 34 = Medium Texturd Soils (loamy) |   | fine textured soils (clay) | 40 = Fine Textured Soils (clay) |   | organic soils | 41 = Fine Textured Soils (clay) |    | coarse textured soils (sandy) | 42 = Fine Textured Soils (clay) |    | medium textured soils (loamy) | 43 = Fine Textured Soils (clay) |  | organic soils | 99 = Glaciers, Rocks, Shifting Sand, No data |  |  | 97 = Water |  |  |
| 10 = Organic Soils                                                                                  |                                                                                                                                                                                                                                                                                                                                                                                                                                                                                                                                                                                                                                                                                                                                                                                                                                                                                                                                                                                                                                                                                                                                                                                                                                                                                                                                                                                                                                                                                                                                                                                                                                                                                                                                                  | coarse textured soils (sandy) |        |                    |           |                               |                    |      |                               |                    |   |                            |                    |   |               |                                   |    |                               |                                   |     |                            |                                   |   |               |                                   |   |                               |                                   |   |                            |                                   |    |               |                                   |         |                               |                                   |   |                            |                                 |   |               |                                 |    |                               |                                 |    |                               |                                 |  |               |                                              |  |  |            |  |  |
| 12 = Organic Soils                                                                                  |                                                                                                                                                                                                                                                                                                                                                                                                                                                                                                                                                                                                                                                                                                                                                                                                                                                                                                                                                                                                                                                                                                                                                                                                                                                                                                                                                                                                                                                                                                                                                                                                                                                                                                                                                  | medium textured soils (loamy) |        |                    |           |                               |                    |      |                               |                    |   |                            |                    |   |               |                                   |    |                               |                                   |     |                            |                                   |   |               |                                   |   |                               |                                   |   |                            |                                   |    |               |                                   |         |                               |                                   |   |                            |                                 |   |               |                                 |    |                               |                                 |    |                               |                                 |  |               |                                              |  |  |            |  |  |
| 13 = Organic Soils                                                                                  |                                                                                                                                                                                                                                                                                                                                                                                                                                                                                                                                                                                                                                                                                                                                                                                                                                                                                                                                                                                                                                                                                                                                                                                                                                                                                                                                                                                                                                                                                                                                                                                                                                                                                                                                                  | fine textured soils (clay)    |        |                    |           |                               |                    |      |                               |                    |   |                            |                    |   |               |                                   |    |                               |                                   |     |                            |                                   |   |               |                                   |   |                               |                                   |   |                            |                                   |    |               |                                   |         |                               |                                   |   |                            |                                 |   |               |                                 |    |                               |                                 |    |                               |                                 |  |               |                                              |  |  |            |  |  |
| 14 = Organic Soils                                                                                  |                                                                                                                                                                                                                                                                                                                                                                                                                                                                                                                                                                                                                                                                                                                                                                                                                                                                                                                                                                                                                                                                                                                                                                                                                                                                                                                                                                                                                                                                                                                                                                                                                                                                                                                                                  | organic soils                 |        |                    |           |                               |                    |      |                               |                    |   |                            |                    |   |               |                                   |    |                               |                                   |     |                            |                                   |   |               |                                   |   |                               |                                   |   |                            |                                   |    |               |                                   |         |                               |                                   |   |                            |                                 |   |               |                                 |    |                               |                                 |    |                               |                                 |  |               |                                              |  |  |            |  |  |
| 20 = Course Texturd Soils (sandy)                                                                   |                                                                                                                                                                                                                                                                                                                                                                                                                                                                                                                                                                                                                                                                                                                                                                                                                                                                                                                                                                                                                                                                                                                                                                                                                                                                                                                                                                                                                                                                                                                                                                                                                                                                                                                                                  | medium textured soils (loamy) |        |                    |           |                               |                    |      |                               |                    |   |                            |                    |   |               |                                   |    |                               |                                   |     |                            |                                   |   |               |                                   |   |                               |                                   |   |                            |                                   |    |               |                                   |         |                               |                                   |   |                            |                                 |   |               |                                 |    |                               |                                 |    |                               |                                 |  |               |                                              |  |  |            |  |  |
| 21 = Course Texturd Soils (sandy)                                                                   |                                                                                                                                                                                                                                                                                                                                                                                                                                                                                                                                                                                                                                                                                                                                                                                                                                                                                                                                                                                                                                                                                                                                                                                                                                                                                                                                                                                                                                                                                                                                                                                                                                                                                                                                                  | fine textured soils (clay)    |        |                    |           |                               |                    |      |                               |                    |   |                            |                    |   |               |                                   |    |                               |                                   |     |                            |                                   |   |               |                                   |   |                               |                                   |   |                            |                                   |    |               |                                   |         |                               |                                   |   |                            |                                 |   |               |                                 |    |                               |                                 |    |                               |                                 |  |               |                                              |  |  |            |  |  |
| 23 = Course Texturd Soils (sandy)                                                                   |                                                                                                                                                                                                                                                                                                                                                                                                                                                                                                                                                                                                                                                                                                                                                                                                                                                                                                                                                                                                                                                                                                                                                                                                                                                                                                                                                                                                                                                                                                                                                                                                                                                                                                                                                  | organic soils                 |        |                    |           |                               |                    |      |                               |                    |   |                            |                    |   |               |                                   |    |                               |                                   |     |                            |                                   |   |               |                                   |   |                               |                                   |   |                            |                                   |    |               |                                   |         |                               |                                   |   |                            |                                 |   |               |                                 |    |                               |                                 |    |                               |                                 |  |               |                                              |  |  |            |  |  |
| 24 = Course Texturd Soils (sandy)                                                                   |                                                                                                                                                                                                                                                                                                                                                                                                                                                                                                                                                                                                                                                                                                                                                                                                                                                                                                                                                                                                                                                                                                                                                                                                                                                                                                                                                                                                                                                                                                                                                                                                                                                                                                                                                  | medium textured soils (loamy) |        |                    |           |                               |                    |      |                               |                    |   |                            |                    |   |               |                                   |    |                               |                                   |     |                            |                                   |   |               |                                   |   |                               |                                   |   |                            |                                   |    |               |                                   |         |                               |                                   |   |                            |                                 |   |               |                                 |    |                               |                                 |    |                               |                                 |  |               |                                              |  |  |            |  |  |
| 30 = Medium Texturd Soils (loamy)                                                                   |                                                                                                                                                                                                                                                                                                                                                                                                                                                                                                                                                                                                                                                                                                                                                                                                                                                                                                                                                                                                                                                                                                                                                                                                                                                                                                                                                                                                                                                                                                                                                                                                                                                                                                                                                  | fine textured soils (clay)    |        |                    |           |                               |                    |      |                               |                    |   |                            |                    |   |               |                                   |    |                               |                                   |     |                            |                                   |   |               |                                   |   |                               |                                   |   |                            |                                   |    |               |                                   |         |                               |                                   |   |                            |                                 |   |               |                                 |    |                               |                                 |    |                               |                                 |  |               |                                              |  |  |            |  |  |
| 31 = Medium Texturd Soils (loamy)                                                                   |                                                                                                                                                                                                                                                                                                                                                                                                                                                                                                                                                                                                                                                                                                                                                                                                                                                                                                                                                                                                                                                                                                                                                                                                                                                                                                                                                                                                                                                                                                                                                                                                                                                                                                                                                  | organic soils                 |        |                    |           |                               |                    |      |                               |                    |   |                            |                    |   |               |                                   |    |                               |                                   |     |                            |                                   |   |               |                                   |   |                               |                                   |   |                            |                                   |    |               |                                   |         |                               |                                   |   |                            |                                 |   |               |                                 |    |                               |                                 |    |                               |                                 |  |               |                                              |  |  |            |  |  |
| 32 = Medium Texturd Soils (loamy)                                                                   |                                                                                                                                                                                                                                                                                                                                                                                                                                                                                                                                                                                                                                                                                                                                                                                                                                                                                                                                                                                                                                                                                                                                                                                                                                                                                                                                                                                                                                                                                                                                                                                                                                                                                                                                                  | coarse textured soils (sandy) |        |                    |           |                               |                    |      |                               |                    |   |                            |                    |   |               |                                   |    |                               |                                   |     |                            |                                   |   |               |                                   |   |                               |                                   |   |                            |                                   |    |               |                                   |         |                               |                                   |   |                            |                                 |   |               |                                 |    |                               |                                 |    |                               |                                 |  |               |                                              |  |  |            |  |  |
| 34 = Medium Texturd Soils (loamy)                                                                   |                                                                                                                                                                                                                                                                                                                                                                                                                                                                                                                                                                                                                                                                                                                                                                                                                                                                                                                                                                                                                                                                                                                                                                                                                                                                                                                                                                                                                                                                                                                                                                                                                                                                                                                                                  | fine textured soils (clay)    |        |                    |           |                               |                    |      |                               |                    |   |                            |                    |   |               |                                   |    |                               |                                   |     |                            |                                   |   |               |                                   |   |                               |                                   |   |                            |                                   |    |               |                                   |         |                               |                                   |   |                            |                                 |   |               |                                 |    |                               |                                 |    |                               |                                 |  |               |                                              |  |  |            |  |  |
| 40 = Fine Textured Soils (clay)                                                                     |                                                                                                                                                                                                                                                                                                                                                                                                                                                                                                                                                                                                                                                                                                                                                                                                                                                                                                                                                                                                                                                                                                                                                                                                                                                                                                                                                                                                                                                                                                                                                                                                                                                                                                                                                  | organic soils                 |        |                    |           |                               |                    |      |                               |                    |   |                            |                    |   |               |                                   |    |                               |                                   |     |                            |                                   |   |               |                                   |   |                               |                                   |   |                            |                                   |    |               |                                   |         |                               |                                   |   |                            |                                 |   |               |                                 |    |                               |                                 |    |                               |                                 |  |               |                                              |  |  |            |  |  |
| 41 = Fine Textured Soils (clay)                                                                     |                                                                                                                                                                                                                                                                                                                                                                                                                                                                                                                                                                                                                                                                                                                                                                                                                                                                                                                                                                                                                                                                                                                                                                                                                                                                                                                                                                                                                                                                                                                                                                                                                                                                                                                                                  | coarse textured soils (sandy) |        |                    |           |                               |                    |      |                               |                    |   |                            |                    |   |               |                                   |    |                               |                                   |     |                            |                                   |   |               |                                   |   |                               |                                   |   |                            |                                   |    |               |                                   |         |                               |                                   |   |                            |                                 |   |               |                                 |    |                               |                                 |    |                               |                                 |  |               |                                              |  |  |            |  |  |
| 42 = Fine Textured Soils (clay)                                                                     |                                                                                                                                                                                                                                                                                                                                                                                                                                                                                                                                                                                                                                                                                                                                                                                                                                                                                                                                                                                                                                                                                                                                                                                                                                                                                                                                                                                                                                                                                                                                                                                                                                                                                                                                                  | medium textured soils (loamy) |        |                    |           |                               |                    |      |                               |                    |   |                            |                    |   |               |                                   |    |                               |                                   |     |                            |                                   |   |               |                                   |   |                               |                                   |   |                            |                                   |    |               |                                   |         |                               |                                   |   |                            |                                 |   |               |                                 |    |                               |                                 |    |                               |                                 |  |               |                                              |  |  |            |  |  |
| 43 = Fine Textured Soils (clay)                                                                     |                                                                                                                                                                                                                                                                                                                                                                                                                                                                                                                                                                                                                                                                                                                                                                                                                                                                                                                                                                                                                                                                                                                                                                                                                                                                                                                                                                                                                                                                                                                                                                                                                                                                                                                                                  | organic soils                 |        |                    |           |                               |                    |      |                               |                    |   |                            |                    |   |               |                                   |    |                               |                                   |     |                            |                                   |   |               |                                   |   |                               |                                   |   |                            |                                   |    |               |                                   |         |                               |                                   |   |                            |                                 |   |               |                                 |    |                               |                                 |    |                               |                                 |  |               |                                              |  |  |            |  |  |
| 99 = Glaciers, Rocks, Shifting Sand, No data                                                        |                                                                                                                                                                                                                                                                                                                                                                                                                                                                                                                                                                                                                                                                                                                                                                                                                                                                                                                                                                                                                                                                                                                                                                                                                                                                                                                                                                                                                                                                                                                                                                                                                                                                                                                                                  |                               |        |                    |           |                               |                    |      |                               |                    |   |                            |                    |   |               |                                   |    |                               |                                   |     |                            |                                   |   |               |                                   |   |                               |                                   |   |                            |                                   |    |               |                                   |         |                               |                                   |   |                            |                                 |   |               |                                 |    |                               |                                 |    |                               |                                 |  |               |                                              |  |  |            |  |  |
| 97 = Water                                                                                          |                                                                                                                                                                                                                                                                                                                                                                                                                                                                                                                                                                                                                                                                                                                                                                                                                                                                                                                                                                                                                                                                                                                                                                                                                                                                                                                                                                                                                                                                                                                                                                                                                                                                                                                                                  |                               |        |                    |           |                               |                    |      |                               |                    |   |                            |                    |   |               |                                   |    |                               |                                   |     |                            |                                   |   |               |                                   |   |                               |                                   |   |                            |                                   |    |               |                                   |         |                               |                                   |   |                            |                                 |   |               |                                 |    |                               |                                 |    |                               |                                 |  |               |                                              |  |  |            |  |  |
| <p>Description<br/>Grid VAT table<br/>( Value Attribute Table)</p>                                  | <table border="1"> <thead> <tr> <th>COLUMN</th> <th>ITEM NAME</th> <th>WIDTH</th> <th>OUTPUT</th> <th>TYPE</th> </tr> </thead> <tbody> <tr><td>1</td><td>VALUE</td><td>4</td><td>10</td><td>B</td></tr> <tr><td>5</td><td>COUNT</td><td>4</td><td>10</td><td>B</td></tr> <tr><td>.</td><td>...</td><td>..</td><td>..</td><td>.</td></tr> <tr><td>73</td><td>TXW_S</td><td>4</td><td>16</td><td>B</td></tr> <tr><td>.</td><td>...</td><td>..</td><td>..</td><td>.</td></tr> <tr><td>81</td><td>CNTCODE</td><td>4</td><td>16</td><td>B</td></tr> <tr><td>85</td><td>VALUE_AREA</td><td>4</td><td>16</td><td>B</td></tr> <tr><td>89</td><td>AREAX10000</td><td>16</td><td>16</td><td>I</td></tr> </tbody> </table> <p>TXW_S = values field displayed<br/> CNTCODE = FAO country code<br/> VALUE_AREA = area SqKm of each cell multiplied x 10000<br/> AREAX10000 = area SqKm of the cells ( COUNT * VALUE_AREA )</p>                                                                                                                                                                                                                                                                                                                                                                                                                                                                                                                                                                                                                                                                                                                                                                                                                                |                               |        | COLUMN             | ITEM NAME | WIDTH                         | OUTPUT             | TYPE | 1                             | VALUE              | 4 | 10                         | B                  | 5 | COUNT         | 4                                 | 10 | B                             | .                                 | ... | ..                         | ..                                | . | 73            | TXW_S                             | 4 | 16                            | B                                 | . | ...                        | ..                                | .. | .             | 81                                | CNTCODE | 4                             | 16                                | B | 85                         | VALUE_AREA                      | 4 | 16            | B                               | 89 | AREAX10000                    | 16                              | 16 | I                             |                                 |  |               |                                              |  |  |            |  |  |
| COLUMN                                                                                              | ITEM NAME                                                                                                                                                                                                                                                                                                                                                                                                                                                                                                                                                                                                                                                                                                                                                                                                                                                                                                                                                                                                                                                                                                                                                                                                                                                                                                                                                                                                                                                                                                                                                                                                                                                                                                                                        | WIDTH                         | OUTPUT | TYPE               |           |                               |                    |      |                               |                    |   |                            |                    |   |               |                                   |    |                               |                                   |     |                            |                                   |   |               |                                   |   |                               |                                   |   |                            |                                   |    |               |                                   |         |                               |                                   |   |                            |                                 |   |               |                                 |    |                               |                                 |    |                               |                                 |  |               |                                              |  |  |            |  |  |
| 1                                                                                                   | VALUE                                                                                                                                                                                                                                                                                                                                                                                                                                                                                                                                                                                                                                                                                                                                                                                                                                                                                                                                                                                                                                                                                                                                                                                                                                                                                                                                                                                                                                                                                                                                                                                                                                                                                                                                            | 4                             | 10     | B                  |           |                               |                    |      |                               |                    |   |                            |                    |   |               |                                   |    |                               |                                   |     |                            |                                   |   |               |                                   |   |                               |                                   |   |                            |                                   |    |               |                                   |         |                               |                                   |   |                            |                                 |   |               |                                 |    |                               |                                 |    |                               |                                 |  |               |                                              |  |  |            |  |  |
| 5                                                                                                   | COUNT                                                                                                                                                                                                                                                                                                                                                                                                                                                                                                                                                                                                                                                                                                                                                                                                                                                                                                                                                                                                                                                                                                                                                                                                                                                                                                                                                                                                                                                                                                                                                                                                                                                                                                                                            | 4                             | 10     | B                  |           |                               |                    |      |                               |                    |   |                            |                    |   |               |                                   |    |                               |                                   |     |                            |                                   |   |               |                                   |   |                               |                                   |   |                            |                                   |    |               |                                   |         |                               |                                   |   |                            |                                 |   |               |                                 |    |                               |                                 |    |                               |                                 |  |               |                                              |  |  |            |  |  |
| .                                                                                                   | ...                                                                                                                                                                                                                                                                                                                                                                                                                                                                                                                                                                                                                                                                                                                                                                                                                                                                                                                                                                                                                                                                                                                                                                                                                                                                                                                                                                                                                                                                                                                                                                                                                                                                                                                                              | ..                            | ..     | .                  |           |                               |                    |      |                               |                    |   |                            |                    |   |               |                                   |    |                               |                                   |     |                            |                                   |   |               |                                   |   |                               |                                   |   |                            |                                   |    |               |                                   |         |                               |                                   |   |                            |                                 |   |               |                                 |    |                               |                                 |    |                               |                                 |  |               |                                              |  |  |            |  |  |
| 73                                                                                                  | TXW_S                                                                                                                                                                                                                                                                                                                                                                                                                                                                                                                                                                                                                                                                                                                                                                                                                                                                                                                                                                                                                                                                                                                                                                                                                                                                                                                                                                                                                                                                                                                                                                                                                                                                                                                                            | 4                             | 16     | B                  |           |                               |                    |      |                               |                    |   |                            |                    |   |               |                                   |    |                               |                                   |     |                            |                                   |   |               |                                   |   |                               |                                   |   |                            |                                   |    |               |                                   |         |                               |                                   |   |                            |                                 |   |               |                                 |    |                               |                                 |    |                               |                                 |  |               |                                              |  |  |            |  |  |
| .                                                                                                   | ...                                                                                                                                                                                                                                                                                                                                                                                                                                                                                                                                                                                                                                                                                                                                                                                                                                                                                                                                                                                                                                                                                                                                                                                                                                                                                                                                                                                                                                                                                                                                                                                                                                                                                                                                              | ..                            | ..     | .                  |           |                               |                    |      |                               |                    |   |                            |                    |   |               |                                   |    |                               |                                   |     |                            |                                   |   |               |                                   |   |                               |                                   |   |                            |                                   |    |               |                                   |         |                               |                                   |   |                            |                                 |   |               |                                 |    |                               |                                 |    |                               |                                 |  |               |                                              |  |  |            |  |  |
| 81                                                                                                  | CNTCODE                                                                                                                                                                                                                                                                                                                                                                                                                                                                                                                                                                                                                                                                                                                                                                                                                                                                                                                                                                                                                                                                                                                                                                                                                                                                                                                                                                                                                                                                                                                                                                                                                                                                                                                                          | 4                             | 16     | B                  |           |                               |                    |      |                               |                    |   |                            |                    |   |               |                                   |    |                               |                                   |     |                            |                                   |   |               |                                   |   |                               |                                   |   |                            |                                   |    |               |                                   |         |                               |                                   |   |                            |                                 |   |               |                                 |    |                               |                                 |    |                               |                                 |  |               |                                              |  |  |            |  |  |
| 85                                                                                                  | VALUE_AREA                                                                                                                                                                                                                                                                                                                                                                                                                                                                                                                                                                                                                                                                                                                                                                                                                                                                                                                                                                                                                                                                                                                                                                                                                                                                                                                                                                                                                                                                                                                                                                                                                                                                                                                                       | 4                             | 16     | B                  |           |                               |                    |      |                               |                    |   |                            |                    |   |               |                                   |    |                               |                                   |     |                            |                                   |   |               |                                   |   |                               |                                   |   |                            |                                   |    |               |                                   |         |                               |                                   |   |                            |                                 |   |               |                                 |    |                               |                                 |    |                               |                                 |  |               |                                              |  |  |            |  |  |
| 89                                                                                                  | AREAX10000                                                                                                                                                                                                                                                                                                                                                                                                                                                                                                                                                                                                                                                                                                                                                                                                                                                                                                                                                                                                                                                                                                                                                                                                                                                                                                                                                                                                                                                                                                                                                                                                                                                                                                                                       | 16                            | 16     | I                  |           |                               |                    |      |                               |                    |   |                            |                    |   |               |                                   |    |                               |                                   |     |                            |                                   |   |               |                                   |   |                               |                                   |   |                            |                                   |    |               |                                   |         |                               |                                   |   |                            |                                 |   |               |                                 |    |                               |                                 |    |                               |                                 |  |               |                                              |  |  |            |  |  |
| <p>Note about<br/>the indicator</p>                                                                 | <p>The textural class is an indicator for soil fertility and soil physical conditions (moisture storage, internal drainage). Because only three classes are used on the Soil Map of the World, the information does not allow detailed interpretations.</p>                                                                                                                                                                                                                                                                                                                                                                                                                                                                                                                                                                                                                                                                                                                                                                                                                                                                                                                                                                                                                                                                                                                                                                                                                                                                                                                                                                                                                                                                                      |                               |        |                    |           |                               |                    |      |                               |                    |   |                            |                    |   |               |                                   |    |                               |                                   |     |                            |                                   |   |               |                                   |   |                               |                                   |   |                            |                                   |    |               |                                   |         |                               |                                   |   |                            |                                 |   |               |                                 |    |                               |                                 |    |                               |                                 |  |               |                                              |  |  |            |  |  |

Fig. S3. Food and Agriculture Organization of the United Nations' subsoil texture classification as used in our study (1).

1. Food and Agriculture Organization of the United Nations (2002) *TERRASTAT: Global Land Resources GIS Models and Databases for Poverty and Food Insecurity Mapping*, Land and Water Digital Media Series 20 (Food and Agriculture Organization of the United Nations, Rome).

## Other Supporting Information Files

[Dataset S1 \(XLSX\)](#)

[Dataset S2 \(XLSX\)](#)
